# Supplementary material
Source: publisher figshare collection journal article supplement (https://acs.figshare.com/ndownloader/files/4024189)
Supplement: Supplementary file 1 [file 4024189]

## Supporting Information

# Graphene oxide impregnated PVA-STA composite polymer electrolyte membrane separator for power generation in single chambered Microbial Fuel Cell

Santimoy Khilari<sup>1</sup>, Soumya Pandit<sup>2</sup>, Makarand M. Ghangrekar<sup>3</sup>, Debabrata Pradhan<sup>1</sup>,  
Debabrata Das<sup>2,\*</sup>

<sup>1</sup>Materials Science Centre, Indian Institute of Technology, Kharagpur, Kharagpur-721302. India

<sup>2</sup>Department of Biotechnology, Indian Institute of Technology, Kharagpur, Kharagpur-721302. India

<sup>3</sup>Department of Civil Engineering, Indian Institute of Technology, Kharagpur, Kharagpur-721302. India

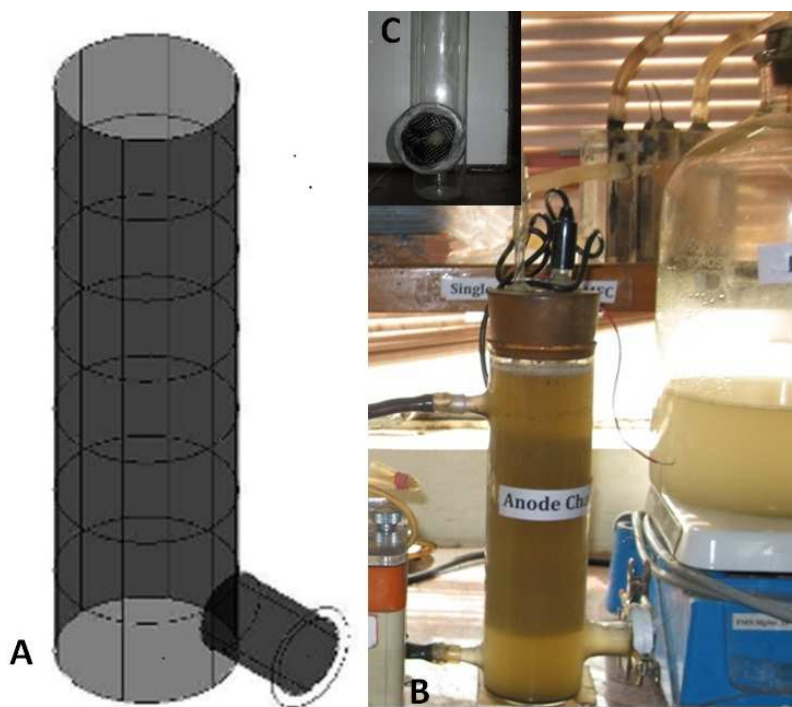

**Figure S1.** a) Schematic diagram of tubular single chambered MFC, b) Photograph of tubular single chambered MFC and c) Front view of cathode of tubular single chambered MFC (Inset).

## Methods

### *Analytical measurements and calculations*

The performance of MFC was examined in terms of power generation and coulombic efficiency. The operating voltage was measured using a digital multimeter with data acquisition system (USB-6009, National Instruments, Texas; USA). The anode and cathode potentials were measured using saturated Ag/AgCl reference electrode. Voltages were recorded every 15 min by a computer (NI LabVIEW–based customized software, Core Technologies, India) and converted to power according to

$$P = I \times V \quad (1)$$

where  $P$  = power,  $I$  = current, and  $V$  = voltage (V). The volumetric power density was expressed by dividing the power by working volume of the anode chamber. The volumetric current density was calculated by normalizing power with respect to anode surface area and anolyte volume of anode compartment respectively (equation 2)

$$i_d = \frac{V}{RV_{and}} \quad (2)$$

where  $R$  the external resistance ( $\Omega$ ) and  $V_{and}$  ( $\text{cm}^3$ ) is the working volume of the anode chamber. The current density  $i_a$  (normalized to anode surface area) was calculated using

$$i_a = \frac{V}{RA} \quad (3)$$

where  $A$  ( $\text{cm}^2$ ) the geometric surface area of the anode electrode. Power density was calculated as

$$P_a = \frac{V^2}{RA} \quad (4)$$

Polarization curves were obtained using variable resistance box (99 k $\Omega$ -0.1  $\Omega$ ). The Coulombic efficiency (CE) is defined as the ratio of total Coulombs actually transferred to the anode from the substrate, to maximum possible Coulombs if all substrate removal produced current. The CE of the MFC operated under batch feed mode over a period of time  $t$ , was calculated according to Logan et al.<sup>1</sup>

$$CE = \frac{M \int_0^t I dt}{Fbv\Delta COD} \quad (5)$$

where  $M = 32$ , molecular weight of oxygen;  $F$ , Faraday's constant = 96485 C/mol;  $b = 4$ , the number of electrons exchanged per mole of oxygen;  $v$  is the volume of the anode chamber of MFC;  $\Delta COD$  is the difference in the COD at  $t=0$  and COD at the end of the batch test.

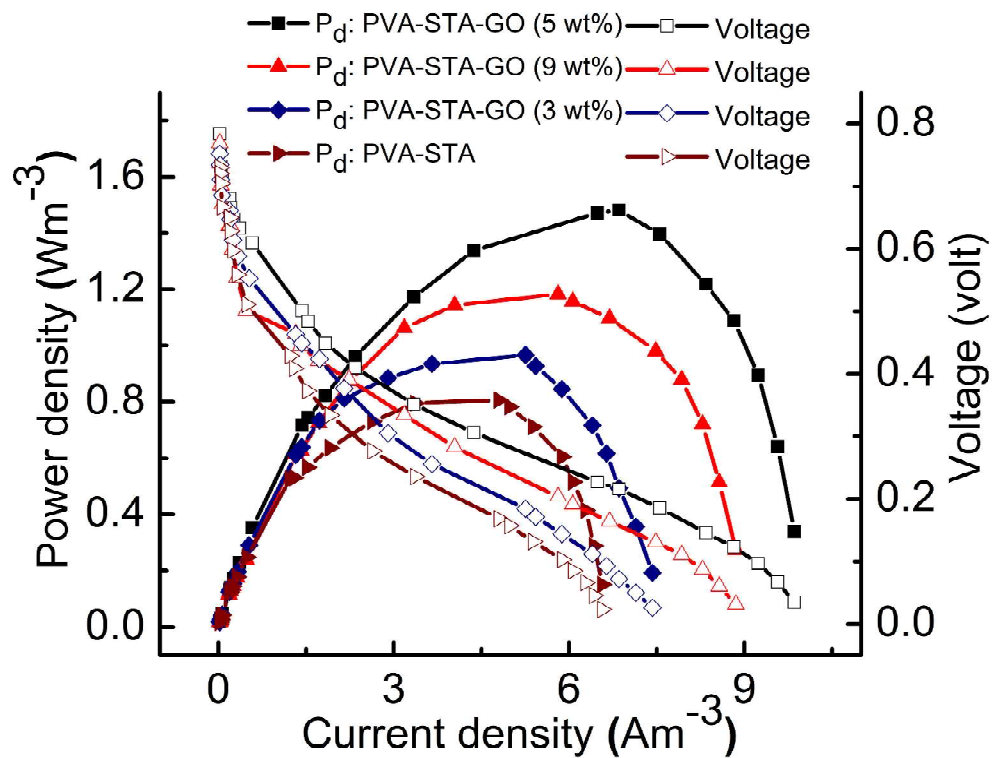

**Figure S2.** Comparison of polarization study of MFCs using with different GO containing PVA-STA-GO membranes and PVA-STA based MCA.

**Table S1. A comparative study in terms of power generation using different membrane in MFC.**

| Anolyte volume | Anode                                   | Cathode                                          | Membrane type                                                                | Highest Power density                            | Reference     |
|----------------|-----------------------------------------|--------------------------------------------------|------------------------------------------------------------------------------|--------------------------------------------------|---------------|
| 13 mL          | Graphite electrode(17 cm <sup>2</sup> ) | Graphite electrode rod(17 cm <sup>2</sup> )      | Sulfonated polyethylene/poly(styrene-co-divinylbenzene) [PE/poly(St-co-DVB)] | 44.1 mW/m <sup>2</sup>                           | 2             |
| 42.5 mL        | carbon paper(15 cm <sup>2</sup> )       | Platinised carbon paper                          | Sulfonated poly(ether ether ketone)/poly(ether sulfone)                      | 70.5 mW/m <sup>2</sup>                           | 3             |
| 28 mL          | Carbon cloth                            | Platinised carbon Cloth(0.5 mg/cm <sup>2</sup> ) | Sulphonated polyetherether ketone (SPEEK)                                    | 5.7 W/m <sup>3</sup>                             | 4             |
| 760 mL         | Graphite plate(20 cm <sup>2</sup> )     | Graphite plate(20 cm <sup>2</sup> )              | Fe <sub>3</sub> O <sub>4</sub> /PES nanocomposite                            | 20 mW/m <sup>2</sup>                             | 5             |
| 350 mL         | Carbon cloth(48 cm <sup>2</sup> )       | Platinised Carbon cloth(18.1 cm <sup>2</sup> )   |                                                                              | 1.9 W/m <sup>3</sup><br>Or 139 mW/m <sup>2</sup> | Present study |

## References

- (1) Logan, B.E.; Hamelers, B.; Rozendal, R.; Schröder, U.; Keller, J.; Freguia, S.; Aelterman, P.; Verstraete, W.; Rabaey, K. Microbial Fuel Cells: Methodology and Technology . *Environ. Sci. Technol.* **2006**, *40*, 5181–5192.
- (2) Grzebyk, M.; Poźniak, G. Microbial Fuel Cells (MFCs) with Interpolymer Cation Exchange Membranes. *Separation and Purification Technology* **2005**, *41*, 321–328.
- (3) Lim, S. S.; Daud, W. R. W.; Md Jahim, J.; Ghasemi, M.; Chong, P. S.; Ismail, M. Sulfonated Poly(ether Ether Ketone)/poly(ether Sulfone) Composite Membranes as an Alternative Proton Exchange Membrane in Microbial Fuel Cells. *International Journal of Hydrogen Energy* **2012**, *37*, 11409–11424.
- (4) Ayyaru, S.; Dharmalingam, S. Development of MFC Using Sulphonated Polyether Ether Ketone (SPEEK) Membrane for Electricity Generation from Waste Water. *Bioresour. Technol.* **2011**, *102*, 11167–11171.
- (5) Rahimnejad, M.; Ghasemi, M.; Najafpour, G. D.; Ismail, M.; Mohammad, A. W.; Ghoreyshi, A. A.; Hassan, S. H. A. Synthesis, Characterization and Application Studies of Self-made Fe<sub>3</sub>O<sub>4</sub>/PES Nanocomposite Membranes in Microbial Fuel Cell. *Electrochimica Acta* **2012**, *85*, 700–706.
